# Supplementary material for: Aldehyde dehydrogenase 1 (ALDH1) immunostaining in axillary lymph node metastases is an independent prognostic factor in ALDH1-positive breast cancer
Source: PubMed Central journal article supplement — J Int Med Res. 2021 Oct 13;49(10):03000605211047279. doi: 10.1177/03000605211047279 (PMC8642120; doi:10.1177/03000605211047279), 2021-10-13
Supplement: sj-pdf-1-imr-10.1177_03000605211047279.pdf [file sj-pdf-1-imr-10.1177_03000605211047279.pdf]

## Certificate from *Medjaden Bioscience Limited*

Dear Sir or Madam:

This document certifies that the manuscript, *Expression of ALDH1 in axillary lymph node metastases in breast cancer*, was edited for proper English language, grammar, punctuation, spelling, and overall style by highly qualified native English speaking and professional scientific editors at *Medjaden Bioscience Limited* on 3<sup>rd</sup> Jan. 2019. Neither the research content nor the authors' intentions were altered in any way during the editing process.

Yours sincerely,

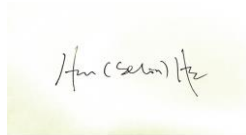

(Ms.) Hua (Selin) He

for *Medjaden*

*Medjaden Bioscience Limited*

General Office

Address: 11415 Ashford Willow, Sugar Land, Texas, 77478, USA

Email: medjaden@gmail.com

Website: www.medjaden.com

### **Information about *Medjaden Bioscience Limited*:**

*Medjaden* is an emerging editing company that provides professional services for laboratory researchers, postgraduates, and clinical doctors. Our mission is to help our clients initiate, maximize and accelerate the production of articles from their research work. The company employs experienced medical statisticians, writers, and editors drawn from both Chinese and English backgrounds worldwide, who strive to ensure that every edited article is published in an English journal, preferably one that is included in the Web of Science (WOS), the Science Citation Index (SCI) Expanded, Medline, PubMed, EMBASE, and other scientific resources.
